1 **Robotic Antimicrobial Susceptibility Platform (RASP): A Next Generation Approach to One-Health**  
2 **Surveillance of Antimicrobial Resistance.**

3 **Running Title: Robotics for Antimicrobial Resistance Surveillance**

4 Alec TRUSWELL<sup>1±</sup>, Rebecca ABRAHAM<sup>1±</sup>, Mark O'DEA<sup>1</sup>, Zheng Zhou LEE<sup>1</sup>, Terence LEE<sup>1</sup>, Tanya LAIRD<sup>1</sup>,  
5 John BLINCO<sup>1</sup>, Shai KAPLAN<sup>2</sup>, John TURNIDGE<sup>3</sup>, Darren J. TROTT<sup>3</sup>, David JORDAN<sup>1,4,5</sup>, Sam ABRAHAM<sup>1,5\*</sup>

6

7 <sup>1</sup>Antimicrobial Resistance and Infectious Diseases Laboratory, College of Science, Health, Engineering  
8 and Education, Murdoch University, Murdoch, Australia

9 <sup>2</sup>SciRobotics Ltd., Kefar Sava, Israel

10 <sup>3</sup>Australian Centre for Antimicrobial Resistance Ecology, School of Animal and Veterinary Sciences, The  
11 University of Adelaide, SA, Australia

12 <sup>4</sup>New South Wales Department of Primary Industries, Wollongbar, NSW, Australia

13 <sup>5</sup>These authors jointly supervised this work: Sam Abraham, David Jordan.

14

15 ± These authors contributed equally: Alec Truswell and Rebecca Abraham

16 \*Corresponding author: [s.abraham@murdoch.edu.au](mailto:s.abraham@murdoch.edu.au)

17

18 **Abstract**

19 *Background*

20 Surveillance of antimicrobial resistance (AMR) is critical to reducing its wide-reaching impact. Its  
21 reliance on sample size invites solutions to longstanding constraints regarding scalability. A robotic  
22 platform (RASP) was developed for high-throughput AMR surveillance in accordance with  
23 internationally recognised standards (CLSI and ISO 20776-1:2019) and validated through a series of  
24 experiments.

25 *Methods*

26 Experiment A compared RASP's ability to achieve consistent MICs to that of a human technician across  
27 eight replicates for four *E. coli* isolates. Experiment B assessed RASP's agreement with human  
28 performed MICs across 91 *E. coli* isolates with a diverse range of AMR profiles. Additionally, to  
29 demonstrate its real-world applicability, the RASP workflow was then applied to five faecal samples  
30 where a minimum of 47 *E. coli* per animal (239 total) were evaluated using an AMR indexing  
31 framework.

32 *Results*

33 For each drug-rater-isolate combination in experiment A, there was a clear consensus of the MIC and  
34 deviation from the consensus remained within one doubling-dilution (the exception being gentamicin  
35 at two dilutions). Experiment B revealed a concordance correlation coefficient of 0.9670 (95%CI:  
36 0.9670 - 0.9670) between the robot and human performed MICs. RASP's application to the five faecal  
37 samples highlighted the intra-animal diversity of gut commensal *E. coli*, identifying between five and  
38 nine unique isolate AMR phenotypes per sample.

39 *Conclusions*

40 While adhering to internationally accepted guidelines, RASP was superior in throughput, cost and data  
41 resolution when compared to an experienced human technician. Integration of robotics platforms in  
42 the microbiology laboratory is a necessary advancement for future One-Health AMR endeavours.

## 43 Introduction

44 Antimicrobial resistance (AMR) has been described as one of the greatest threats to global health and  
45 food security, with an estimated cumulative cost of 100 trillion USD by 2050.<sup>1</sup> The major consequence  
46 of resistance is the escalating difficulty of successfully treating bacterial infections with the currently  
47 available limited array of antimicrobials. We now face the risk of returning to the pre-antibiotic era  
48 where bacterial infections in humans and animals were a major cause of mortality.<sup>2</sup> Preserving the  
49 usefulness of existing antimicrobials by reducing selection and limiting the dissemination of resistant  
50 organisms is therefore a high priority. Consequently, a key component of management efforts is  
51 surveillance designed to keep authorities and clinicians aware of where and when resistance is present  
52 and evolving.<sup>3</sup> Surveillance of AMR faces many challenges owing to the multi-host, multi-pathogen,  
53 multi-drug nature of the resistance phenomenon. Perhaps one of the most problematic aspects is the  
54 insidious nature of resistance - it emerges slowly without necessarily yielding expression of any  
55 outward signs and frequently has an impact at a place and time other than its origin. For surveillance  
56 to overcome these obstacles, careful attention needs to be paid to the choice of pairing of assays for  
57 measuring resistance in bacteria and the design of sample acquisition from animals, food and the  
58 environment.

59 Surveillance for AMR in animals and food is a well-established activity. The WHO has longstanding  
60 recommendations for the conduct of “integrated surveillance”, as part of the multifaceted-  
61 management for the control of resistance.<sup>4</sup> Countries such as Denmark<sup>5</sup> and the USA<sup>6</sup> have been at  
62 the forefront of surveillance for AMR in animals and the food chain with programs running since as  
63 early as 1995. Since then, the basic approach in food-animals, which is now widely adopted  
64 throughout the developed world, has changed very little. A core component is the collection and  
65 analysis of data relating to the AMR profile of indicator bacteria (such as *Escherichia coli*) from various  
66 livestock and commodities.<sup>7</sup> As a result of the high cost per isolate (of which laboratory processing  
67 contributes a significant portion), most national-level surveys typically only collect data on

68 approximately 150-250 individually selected isolates per year from each livestock sector. While the  
69 resulting data provide a general overview on AMR in food-animals, the inferences that can be drawn  
70 are limited. In addition, recent data have demonstrated variation of *E. coli* resistance profiles within  
71 bacterial species from the same host,<sup>8</sup> suggesting that reliable estimates of AMR require the collection  
72 of multiple isolates from a single host.

73 In order to effectively limit the emergence and spread of AMR within groupings of animals or humans,  
74 surveillance data must be strengthened to make it more relevant to antimicrobial stewardship.<sup>9</sup> A  
75 paramount need is for the individuals responsible for antimicrobial stewardship in a setting to receive  
76 intelligence from surveillance describing the occurrence of resistance. To deliver such feedback,  
77 epidemiologically appropriate study design and sample size needs to be combined with cost-effective  
78 characterisation of much larger numbers of bacteria than are currently evaluated.<sup>10</sup> At present the  
79 isolation of large numbers of bacterial colonies, subsequent AST with traditional techniques and  
80 genomic characterisation is not only cost-prohibitive but a severe drain on time and resources. Scaling  
81 up traditional methods is unattractive because it would inevitably introduce inaccuracy arising from  
82 fatigue of laboratory workers. However, the harnessing of high-throughput laboratory robotic  
83 platforms capable of handling individual colonies on an unprecedented scale and without the loss of  
84 accuracy from fatigue we associate with manual methods is a practical solution.

85 In this study, we describe the development of the next generation approach to surveillance for AMR  
86 using a Robotic Antimicrobial Susceptibility Platform (RASP) and demonstrate that the RASP method  
87 is elegantly and efficiently adapted to high-volume surveillance of commensal organisms. The system  
88 automates the process of bacterial isolation, identification (with or without reliance on  
89 spectrography), and AST for customised combinations of drugs. With this comes a much-needed  
90 improvement in the ability to design surveillance to meet objectives that are of practical relevance at  
91 the coalface of antimicrobial stewardship.

## 92 **Methods**

### 93 **System overview**

94 RASP was developed to assess phenotypic resistance in a manner comparable with major surveillance  
95 programs. Unlike other approaches to “scaling up” such as metagenomics, RASP keeps the nucleic acid  
96 of individual isolates available for study making it possible to understand if resistance is mediated by  
97 previously unidentified genes while avoiding biases due to the presence of extraneous nucleic acid  
98 from environmental organisms.

99 RASP is a customisable robotics platform that was designed, using available Tecan (Switzerland) and  
100 SciRobotics Ltd. (Israel) products, to be flexible and multifunctional, capable of bacterial isolation,  
101 isolate collection, preparation for identification and AST. A Tecan Freedom EVO® 150 base was  
102 combined with the SciRobotics carousel capable of holding both petri dishes and 96-well microplates.  
103 SciRobotics equipment was deployed on the robot deck, the PetriPlater™ to dispense samples and  
104 Pickolo™ software using image analysis to select colonies, in addition to a microplate absorbance  
105 reader for AST inoculum adjustment to deliver high-throughput surveillance (Figure S1). The robot has  
106 also been fully integrated with barcoding capabilities to track isolates from original source to  
107 phenotypic results and is integrable with any electronic laboratory information management system.  
108 The general workflow for this method is visualised in Figure 1 and the major steps detailed below.  
109 Homogenised samples are loaded onto the robot in a liquid format and either serially diluted or  
110 directly streaked onto agar. After incubation individual colonies are selected using Pickolo™, based on  
111 the explicit requirements of the user including colour, size and morphology. Individual colonies are  
112 transferred to a 96-well microplate and a deep-well plate in preparation for AST and isolate storage,  
113 respectively. MALDI-TOF identification can also be performed at this timepoint and as such, the robot  
114 includes a position for a MALDI-TOF target plate and is capable of both sample and matrix addition.  
115 AST is then performed using an entirely liquid based methodology adapted for the RASP platform from  
116 internationally established guidelines: Clinical Laboratory Standards Institute (CLSI)<sup>11</sup> and ISO 20776-

117 1:2019; including compliance to quality control criteria. AST drug panels, genotyping and whole  
118 genome sequencing can be prepared using the Freedom EVO genomics platform. While the above  
119 workflow was well suited to this current study, it should be noted that it represents one of many  
120 possibilities. RASP workflows are flexible and due to the modular design of hardware, can be adjusted  
121 to suit different bacterial species, sample types, culture media and drug panels.

## 122 **Bacterial Isolation**

123 Two grams of faecal sample was homogenised in 18 mL PBS. Homogenised samples then underwent  
124 four 10-fold serial dilutions and was plated onto CHROMagar™ ECC (Edwards, MM1076) using the  
125 two-zone spiral plating protocol at  $10^{-3}$  (outer zone) and  $10^{-4}$  (inner zone) (Video S1). After overnight  
126 incubation at 37°C, Pickolo™ colony picking software was used to target and pick up to 48 presumptive  
127 *E. coli* colonies per plate based on their adherence to previously determined colour, size and circularity  
128 criteria (Video S2) and transferred to 96-well plates containing CAMHB (BD, 212322) for overnight  
129 growth at 37°C for storage and subsequent assays.

## 130 **Bacterial Identification**

131 Isolates were prepared for MALDI-TOF identification by adding 40 µL of 90% Formic acid to the  
132 bacterial pellet from overnight culture. (Video S3). Species identification was then performed  
133 by MALDI-TOF adhering to manufacturer's protocol (Bruker MALDI Biotyper Microflex LT/SH MALDI-  
134 MS running MBT Compass 4.1 Build 70 and flexControl 3.4 Build 135).

## 135 **Antimicrobial Susceptibility Testing**

136 All isolates were grown from storage at -80°C onto sheep blood agar (Edwards, MM1120) overnight  
137 at 37°C. A second subculture was performed the following day, and the workflow diverged depending  
138 on the prospective rater.

## 139 *RASP Platform*

140 The robot protocol adjusted isolates from the overnight broth culture using an absorbance reader at  
141 620 nm wavelength, to an absorbance equivalent to a McFarland standard (0.08 to 0.13). The  
142 McFarland standardised isolate was transferred to a deep well plate and diluted 1:20 in sterile  
143 water, and the drug plate was inoculated with 10  $\mu$ L of isolate in 90  $\mu$ L of CAMHB diluted drug (Video  
144 S4). For colony enumeration, the robot performed further dilutions (1:150 followed by another 1:150)  
145 on the previously diluted McFarland standard and plated 100  $\mu$ L on sheep blood agar using a  
146 modification of the two-zone spiral dilution plating method; whereby the entire plate is inoculated as  
147 just one zone (lawn plating). Following an overnight incubation (16 – 20 hours at 37°C as per CLSI  
148 guidelines), drug plate results for both raters were read using the Sensititre Vizion plate reader  
149 system, and colony enumeration on sheep blood agar was performed and recorded using  
150 the Pickolo colony counting software.

#### 151 *Human Technician*

152 Isolates intended for human performed susceptibility testing were subcultured on sheep blood agar,  
153 while isolates intended for robot performed susceptibility testing were subcultured in a flat-bottom  
154 96-well plate (Nunc, 167008), each well filled with 220  $\mu$ L (allowing for overnight evaporation of  
155 roughly 20  $\mu$ L) CAMHB (BD, 212322). The human broth microdilution protocol followed CLSI  
156 guidelines, with the adjustment of isolates to a 0.5 McFarland standard using a nephelometer  
157 (Sensititre™) followed by a 1:100 dilution in CAMHB prior to inoculation of the drug plate  
158 using Sensititre's AIM™ automated inoculation delivery system (50  $\mu$ L inoculum into 50  $\mu$ L of drug  
159 diluted in CAMHB). The colony enumeration quality control step was performed for each isolate on  
160 sheep blood agar as per CLSI guidelines with a 1:1000 dilution of inoculum in 0.9% saline and lawn  
161 plating on agar.

#### 162 **Validation and Application of RASP**



163 To evaluate the capacity of the robot and validate its use in AST, we applied the RASP robotic platform  
164 to the aforementioned workflow using a collection of *E. coli*; as *E. coli* is an ideal indicator organism  
165 and represents a ubiquitous component of surveillance for AMR in animals.<sup>5, 6, 12</sup>

#### 166 **AST Validation Experiment A: Assessment of Repeatability**

167 An experiment was conducted to validate the RASP platform's AST protocol by comparing the ability  
168 of both human and robot rater to generate consistent minimum inhibitory concentrations (MICs)  
169 across replicates. Each rater performed AST on four *E. coli* isolates in octuplicate against the following  
170 antimicrobials: ampicillin, ceftiofur, ceftiofur, chloramphenicol, ciprofloxacin, colistin, ceftiofur,  
171 florfenicol, gentamicin, streptomycin, trimethoprim/sulfamethoxazole and tetracycline. Isolates were  
172 derived from various sources including an American Type Culture Collection 25922, and one isolate of  
173 seagull<sup>13</sup>, porcine<sup>14</sup> and cattle origin<sup>15</sup>, each with previously determined AMR profiles.

#### 174 **AST Validation Experiment B: Assessment of Rater Agreeance**

175 Experiment B was a breadth study whereby the RASP platform and an experienced human technician  
176 performed AST on a diverse range of isolates (n=91) with varying, previously characterised AMR  
177 profiles and host origins (seagull, porcine, cattle).<sup>13-17</sup> The RASP platform was assessed based on its  
178 agreeance with the human technician in their determination of MICs for each isolate. Antimicrobials  
179 tested included: ampicillin, ceftiofur, ceftiofur, chloramphenicol, ciprofloxacin, colistin, ceftiofur,  
180 florfenicol, gentamicin, streptomycin, trimethoprim/sulfamethoxazole and tetracycline.

#### 181 **RASP Workflow Application: Antimicrobial Resistance Surveillance Index Scoring**

182 To demonstrate the level of resolution achievable with RASP, five faecal samples were collected from  
183 pig pen floors (one sample per pen) and proceeded through the RASP workflow described above to  
184 yield AST data for 239 derivative *E. coli* isolates (minimum to 47 per sample) against six antimicrobials  
185 (ampicillin, ceftiofur, ciprofloxacin, gentamicin, tetracycline and trimethoprim sulfamethoxazole). A  
186 secondary classification and visualisation script devised in Stata<sup>18</sup> was applied to the 239 isolates to

187 generate a graphical representation of intra-animal and intra-herd diversity, as well as to assign an  
188 index score representative of the threat posed by their AMR burden. The indexing scheme assigned  
189 weights ( $w$ ) to antimicrobials informed by national<sup>19</sup> and international<sup>20</sup> guidelines whereby the  
190 antimicrobials deemed more important to human health received a higher weighting. Antimicrobial  
191 weights were as follows: ampicillin ( $w=1$ ), ceftiofur ( $w=3$ ), ciprofloxacin ( $w=4$ ), gentamicin ( $w= 2$ ),  
192 tetracycline ( $w=1$ ) and trimethoprim sulfamethoxazole ( $w=2$ ). In this study the maximum possible  
193 AMR score was 13, indicating resistance to all tested antimicrobials.

#### 194 **Throughput Comparison Analysis**

195 An analytical component of this study sought to compare the time required by a human technician  
196 utilising current methods, versus a robot-assisted technician, to process 20 homogenised faecal  
197 samples (deriving 960 isolates) from isolation through to phenotypic characterisation. A simulated  
198 workflow was developed for each technician based on average times taken to perform each task  
199 within the workflow and applied to the above scenario. The human technician was allowed the use of  
200 'modern' laboratory implements such as Sensititre's auto-inoculator and Vizion plate reader systems,  
201 pre-ordered ready-to-use drug plates, and a MALDI-TOF, while the robot assisted technician had the  
202 two previously discussed Tecan robots, a MALDI-TOF and a Sensititre Vizion plate reader system at  
203 their disposal.

## 204 **Results**

### 205 **AST Validation Experiment A: Assessment of Repeatability**

206 In Experiment A, when comparing the human (H) and robot (R) MIC results for each isolate, the mode  
207 MIC of an isolate across both raters against a specific antimicrobial was labelled the 'consensus MIC'  
208 and any deviation from the consensus MIC deemed a departure from the truest result (Figure 2). Of  
209 the drug-rater-antimicrobial combinations tested (see Figure S2 for all combinations), the majority  
210 show all eight replicates having achieved the same MIC result, and furthermore demonstrate  
211 agreeance between the two raters; all isolates and replicates tested against tetracycline achieved the  
212 same MIC between both isolate and rater. Of the cases where deviation from the consensus MIC was  
213 seen, it was limited to one doubling-dilution (the exception being gentamicin at two dilutions) and  
214 there remained moderate agreement between the two raters, with similar distributions of replicates  
215 across MIC results.

### 216 **AST Validation Experiment B: Assessment of Rater Agreement**

217 In Experiment B, the majority of combinations of isolates and drugs (67.6 %) tested showed complete  
218 agreement between the two human and robot raters while 23.4% had a discrepancy in MIC result by  
219 one, which is acceptable according to international guidelines, and 9.0% had a discrepancy of two or  
220 more doubling dilutions (Figure 3). The greatest discrepancy in MIC between raters was a difference  
221 of nine dilutions between the two results and represented 0.26% of the isolate-drug combinations  
222 tested. The overall agreement for isolate-drug combinations between robot and human was  
223 summarised by a concordance correlation coefficient of 0.9670 (95%CI: 0.9670 - 0.9670), N: 1092.

### 224 **RASP Workflow Application: Antimicrobial Resistance Surveillance Index Scoring**

225 All homogenised faecal samples that were plated by RASP on CHROMagar™ ECC selective agars  
226 yielded growth of at least 48 single colonies matching the expected blue appearance of *E. coli* at one  
227 or both dilutions. Isolates were successfully identified as *E. coli* using RASP's MALDI-TOF preparation

228 protocol, all with high identification scores; the lowest identification score achieved was 2.2 which  
229 qualified within Bruker's highest confidence range.

230 Samples from all animals exhibited a diverse range of AMR profiles amongst isolates, including  
231 resistance to antimicrobials tested (Figure 4). All animals, except one, had isolates representing an  
232 AMR index of zero. The highest AMR index recorded was 13, comprising resistance to all tested  
233 antimicrobials. A relatively balanced distribution of AMR indices was seen for the 48 isolates from  
234 most animals; the exception being pig 'E', from which isolates were heavily skewed towards low AMR  
235 indices, with a high density achieving an AMR index of one.

### 236 **Throughput Comparison Analysis**

237 It was estimated that the human technician would take 30 days to process these samples compared  
238 to nine days for a robot-assisted technician (Figure S3). It's important to state that the robots were  
239 not in continuous use during this workflow, meaning there was time where they could also have been  
240 utilised for other tasks.

241 **Discussion**

242 The impetus to transition microbiology from a manual-labour-centric profession to one embracing  
243 automation is nothing novel. Automation offers the same advantage it has provided industry for  
244 decades; the augmentation of processes to increase efficiency and throughput; and this statement  
245 holds true for the application of the RASP platform to a conventional microbiology workflow. Typically,  
246 several technicians would be required in the manual workflow depicted in Figure S3 to prevent the  
247 occurrence of issues such as fatigue, and even still it is unlikely that optimal pace and quality of work  
248 would be maintained for the entirety of the workflow; a problem to which the robot is immune. The  
249 utilization of robotics instead allows staff to be diverted from monotonous and error-prone tasks to  
250 more cognitively intensive ones such as data analysis and project management.<sup>21, 22</sup> These increases  
251 to throughput are only significant, however, if the solution is financially viable. It is therefore  
252 important to note that the improvement in processing efficiency is just one of several ways by which  
253 automation alleviates sample processing costs; savings are also seen on materials and reagents as a  
254 result of the transition to liquid-based methodologies (90% estimated cost reduction). In  
255 consideration of the initial financial outlay of purchasing the RASP platform (400,000 AUD; equivalent  
256 to approximately 300,000 USD or 260,000 EUR), we determined that approximately 9,000 samples  
257 would need to be processed for the above savings to equate to this initial cost. The incorporation of  
258 robotics into the routine microbiological assays described in this study is the technological leap  
259 required to elevate the standard of future One-Health AMR surveillance.

260 While currently available laboratory robotic systems (e.g. VITEK®, Microscan, WASPLab® and BD  
261 Phoenix™) do offer the automation of isolation, identification or antimicrobial susceptibility testing,  
262 in comparison to RASP they utilise largely inflexible (in terms of pre-determined AST panels and  
263 characterisation of a single isolate)<sup>23</sup> procedures to generate this information. We have developed the  
264 first integrated system – from isolation to AMR profile production that meets international guidelines  
265 and demonstrated that the method meets or exceeds the standards required. The Freedom EVO

266 microbiology robot and by association the RASP protocol described here, utilises broth microdilution  
267 testing and MALDI-TOF integration (both gold-standard microbiological procedures) to capitalise on  
268 the higher throughput and resolution of data offered by its liquid-adapted methods.

269 AST completed by the robot was comparable to human generated data with similar patterns of MIC  
270 variance observed. AST in its current format is highly variable as can be seen by the wide range of MIC  
271 values acceptable for highly tested ATCC control strains.<sup>11</sup> This phenomenon was well depicted in  
272 Experiment A, where under well-controlled, faithfully replicated conditions, MIC results from  
273 replicates of the same isolate spanning two or three doubling dilutions were commonly observed. The  
274 symmetry of MIC distributions between raters in these instances suggests that the source of this  
275 variation is biological in nature, due perhaps, to phenomena such as isolates expelling their plasmid,  
276 delayed expression of AMR genes or natural assay variations, as opposed to a technical failure by  
277 either rater.

278 Due to the restrictions of conventional methods considered above, most surveys will collect  
279 information for approximately 200 isolates per year per country, which limits the inferences that can  
280 be drawn. For example, with respect to the ability to detect early-emergence of resistance to a key  
281 drug, a simple application of binomial probability (expressed as:  $P(X>0) \mid X \sim \text{Bin}(200, 0.01)$ )  
282 demonstrates that a survey relying on 200 isolates has a probability of only 13.4% of detecting any  
283 positives if only 1% of isolates in the population have the resistance trait of interest. This calculation  
284 substantially underestimates the true number of isolates required during surveillance because  
285 reliance on a multi-staged sampling design (selection of herds, then animals, then isolates) is essential  
286 and carries a cost in accuracy created by the design effect.<sup>24</sup> The AMR indexing experiment included  
287 in this study supports other data<sup>8, 25</sup> in confirming that variation of *E. coli* resistance profiles within  
288 bacterial species from the same host and same group of animals is commonplace. The high level of  
289 resolution available from RASP for describing resistance in microbial populations, and its ability to  
290 yield an affordable increase in the number of samples and isolates assessed, was demonstrated in the

291 final validation experiment in this study by the diversity of AMR profiles. In this final study only 0.4%  
292 (n=1) of tested isolates had an AMR index of 13, 1.7% (n=4) had resistance to gentamicin and 1.3%  
293 (n=3) had resistance to ceftiofur. There was also a corresponding variation in the number of AMR  
294 profiles for *E. coli* within a host: there being from 6-9 distinct variants detected in individuals, and  
295 more would likely be detected with higher sample sizes. With the availability of RASP there is an  
296 unprecedented opportunity to strengthen the management of AMR by shifting from a focus of  
297 interpretation adapted to clinical isolates to one that expressly accommodates the diversity of  
298 resistance in hosts at every level of organisation. Data generated on an expanded scale by RASP  
299 therefore presents an opportunity to provide more meaningful guidance on antimicrobial stewardship  
300 at the farm level through to national and international policy.

301 **Conclusion**

302 RASP and technologies alike, unlock a higher calibre of AMR surveillance by overcoming longstanding  
303 constraints to scalability. The flexibility of RASP permits its application well beyond the scope  
304 demonstrated here, to the diverse range of bacterial landscapes encountered in the One-Health  
305 system. This study saw RASP's workflow benchmarked against that of a contemporary laboratory,  
306 where it was demonstrated to be equivalent to an experienced human technician but proved superior  
307 in throughput, endurance and cost. It is critical that microbiology harnesses robotic platforms like  
308 RASP if we are to resist the current trajectory of AMR.



309 **Funding**

310 This project is supported by funding from the Australian Government Department of Agriculture,

311 Water and the Environment as part of its Rural R&D for Profit program

312 **Author Contributions**

313 A. T., R. A., Z. L., T. L. and S. A. designed and performed the plating and colony picking experiments. A.  
314 T., R. A., J. B. and S. A. designed and performed the antimicrobial susceptibility testing experiments.  
315 J. T. and D. T. provided consultation on the antimicrobial susceptibility testing experiments as well as  
316 assisting with its validation according to international guidelines. S. K. developed the RASP platform  
317 adapting the hardware and software for microbiological use and provided consultation throughout  
318 the study. S. A., D. J., R. A., M. O. and D. T. conceived the project and S. A., R. A., M. O. and D. J.  
319 supervised the project. A. T., R. A., D. J., T. Lee. and S. A. performed data analysis. A. T., R. A., D. J. and  
320 S. A. wrote the initial draft of the manuscript, T. L., A. T., R. A. and S. A. designed figures and all authors  
321 contributed to editing and proof reading of the manuscript.

322 **Transparency Declaration**

323 The authors declare no competing interests.

324

## 325 References

- 326 1. O'Neill J. Tackling drug-resistant infections globally: Final report and recommendations. *HM*  
327 *Government and Wellcome Trust: UK* 2016.
- 328 2. World Health Organization. *Antimicrobial resistance: global report on surveillance*, 2014.  
329 <https://www.who.int/antimicrobial-resistance/publications/surveillancereport/en/>
- 330 3. Organization WH. Global antimicrobial resistance surveillance system (GLASS) report: early  
331 implementation 2017-2018. 2018. [https://www.who.int/glass/resources/publications/early-](https://www.who.int/glass/resources/publications/early-implementation-report-2017-2018/en/)  
332 [implementation-report-2017-2018/en/](https://www.who.int/glass/resources/publications/early-implementation-report-2017-2018/en/)
- 333 4. Integrated Surveillance of Antimicrobial Resistance in Foodborne Bacteria: Application of a  
334 One Health Approach. Geneva: World Health Organization; 2017. Licence: CC BY-NC-SA 3.0  
335 IGO.
- 336 5. DANMAP 2018 - Use of antimicrobial agents and occurrence of antimicrobial resistance in  
337 bacteria from food animals, food and humans in Denmark. ISSN 1600-2032.
- 338 6. Food and Drug Administration (FDA). 2016-2017 NARMS Integrated Summary. Rockville, MD:  
339 U.S. Department of Health and Human Services. [https://www.fda.gov/animal-](https://www.fda.gov/animal-veterinary/national-antimicrobial-resistance-monitoring-system/2016-2017-narms-integrated-summary-interactive)  
340 [veterinary/national-antimicrobial-resistance-monitoring-system/2016-2017-narms-](https://www.fda.gov/animal-veterinary/national-antimicrobial-resistance-monitoring-system/2016-2017-narms-integrated-summary-interactive)  
341 [integrated-summary-interactive](https://www.fda.gov/animal-veterinary/national-antimicrobial-resistance-monitoring-system/2016-2017-narms-integrated-summary-interactive).
- 342 7. Schrijver R, Stijntjes M, Rodríguez-Baño J *et al*. Review of antimicrobial resistance surveillance  
343 programmes in livestock and meat in EU with focus on humans. *Clin Microbiol Infect* 2018; **24**:  
344 577-90.
- 345 8. Tenailon O, Skurnik D, Picard B *et al*. The population genetics of commensal *Escherichia coli*.  
346 *Nat Rev Microbiol* 2010; **8**: 207-17.
- 347 9. Tacconelli E, Sifakis F, Harbarth S *et al*. Surveillance for control of antimicrobial resistance. *The*  
348 *Lancet Infect Dis* 2018; **18**: e99-e106.
- 349 10. McArthur AG, Tsang KK. Antimicrobial resistance surveillance in the genomic age. *Ann NY Acad*  
350 *Sci* 2017; **1388**: 78-91.
- 351 11. CLSI. *Performance Standards for Antimicrobial Susceptibility Testing*. 29th ed. CLSI  
352 supplement M100. Wayne, PA: Clinical and Laboratory Standards Institute; 2019.
- 353 12. Abraham S, O'Dea M, Sahibzada S *et al*. *Escherichia coli* and *Salmonella spp.* isolated from  
354 Australian meat chickens remain susceptible to critically important antimicrobial agents. *PLoS*  
355 *One* 2019; **14**: e0224281.
- 356 13. Mukerji S, Stegger M, Truswell AV *et al*. Resistance to critically important antimicrobials in  
357 Australian silver gulls (*Chroicocephalus novaehollandiae*) and evidence of anthropogenic  
358 origins. *J Antimicrob Chemother* 2019; **74**: 2566-74.
- 359 14. Abraham S, Kirkwood RN, Laird T *et al*. Dissemination and persistence of extended-spectrum  
360 cephalosporin-resistance encoding IncI1-bla CTXM-1 plasmid among *Escherichia coli* in pigs.  
361 *ISME J* 2018; **12**: 2352-62.
- 362 15. Barlow RS, McMillan KE, Duffy LL *et al*. Prevalence and antimicrobial resistance of *Salmonella*  
363 and *Escherichia coli* from Australian cattle populations at slaughter. *J Food Prot* 2015; **78**: 912-  
364 20.
- 365 16. Abraham S, Jordan D, Wong HS *et al*. First detection of extended-spectrum cephalosporin-and  
366 fluoroquinolone-resistant *Escherichia coli* in Australian food-producing animals. *J Glob*  
367 *Antimicrob Resist* 2015; **3**: 273-7.
- 368 17. Mukerji S, Gunasekera S, Dunlop JN *et al*. Implications of foraging and interspecies interactions  
369 of birds for carriage of *Escherichia coli* strains resistant to critically important antimicrobials.  
370 *Appl Environ Microbiol* 2020; **86**: 20.
- 371 18. StataCorp. 2019. Stata Statistical Software: Release 16. College Station TSL.
- 372 19. Jordan D. Antimicrobial ratings: the importance of importance. *Aust Vet J* 2019; **97**: 283-4.
- 373 20. Critically important antimicrobials for human medicine, 6th revision. Geneva: World Health  
374 Organization; 2019. Licence: CC BY-NC-SA 3.0 IGO.

- 375 21. Bailey AL, Ledebner N, Burnham C-AD. Clinical microbiology is growing up: the total laboratory  
376 automation revolution. *Clin Chem* 2019; **65**: 634-43.
- 377 22. Evans JV. Automation and Molecular Diagnostics: A New Era in Clinical Microbiology. *Clin Lab*  
378 *Sci* 2020; doi:10.29074/ascls.119.001883
- 379 23. Snyder JW, Thomson GK, Heckman S *et al.* Automated preparation for identification and  
380 antimicrobial susceptibility testing: evaluation of a research use only prototype, the BD Kiestra  
381 IdentifA/SusceptA system. *Clin Microbiol Infect* 2020; doi:10.1016/j.cmi.2020.07.007
- 382 24. Bell BA, Onwuegbuzie AJ, Ferron JM *et al.* Use of design effects and sample weights in complex  
383 health survey data: a review of published articles using data from 3 commonly used  
384 adolescent health surveys. *Am J Public Health* 2012; **102**: 1399-405.
- 385 25. Dunlop R, McEwen S, Meek A *et al.* Sampling considerations for herd-level measurement of  
386 faecal *Escherichia coli* antimicrobial resistance in finisher pigs. *Epidemiol Infect* 1999; **122**: 485-  
387 96.
- 388

389 **Figures**

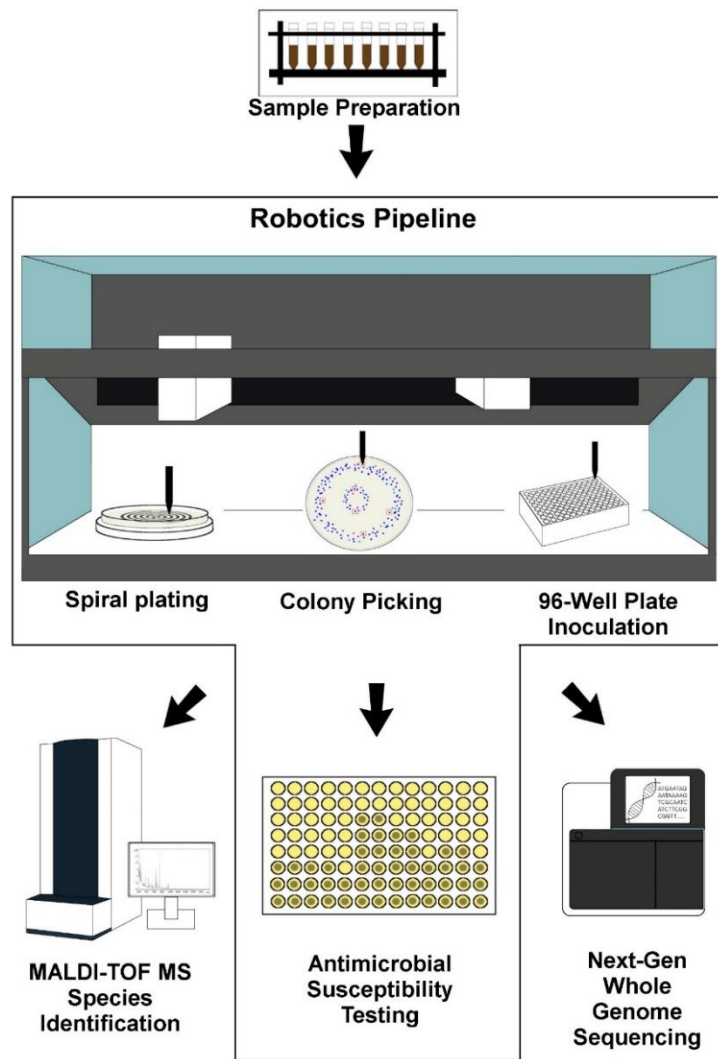

390

391 **Figure 1** | Overview of a typical RASP workflow. Any processes depicted outside the border occur externally to RASP.

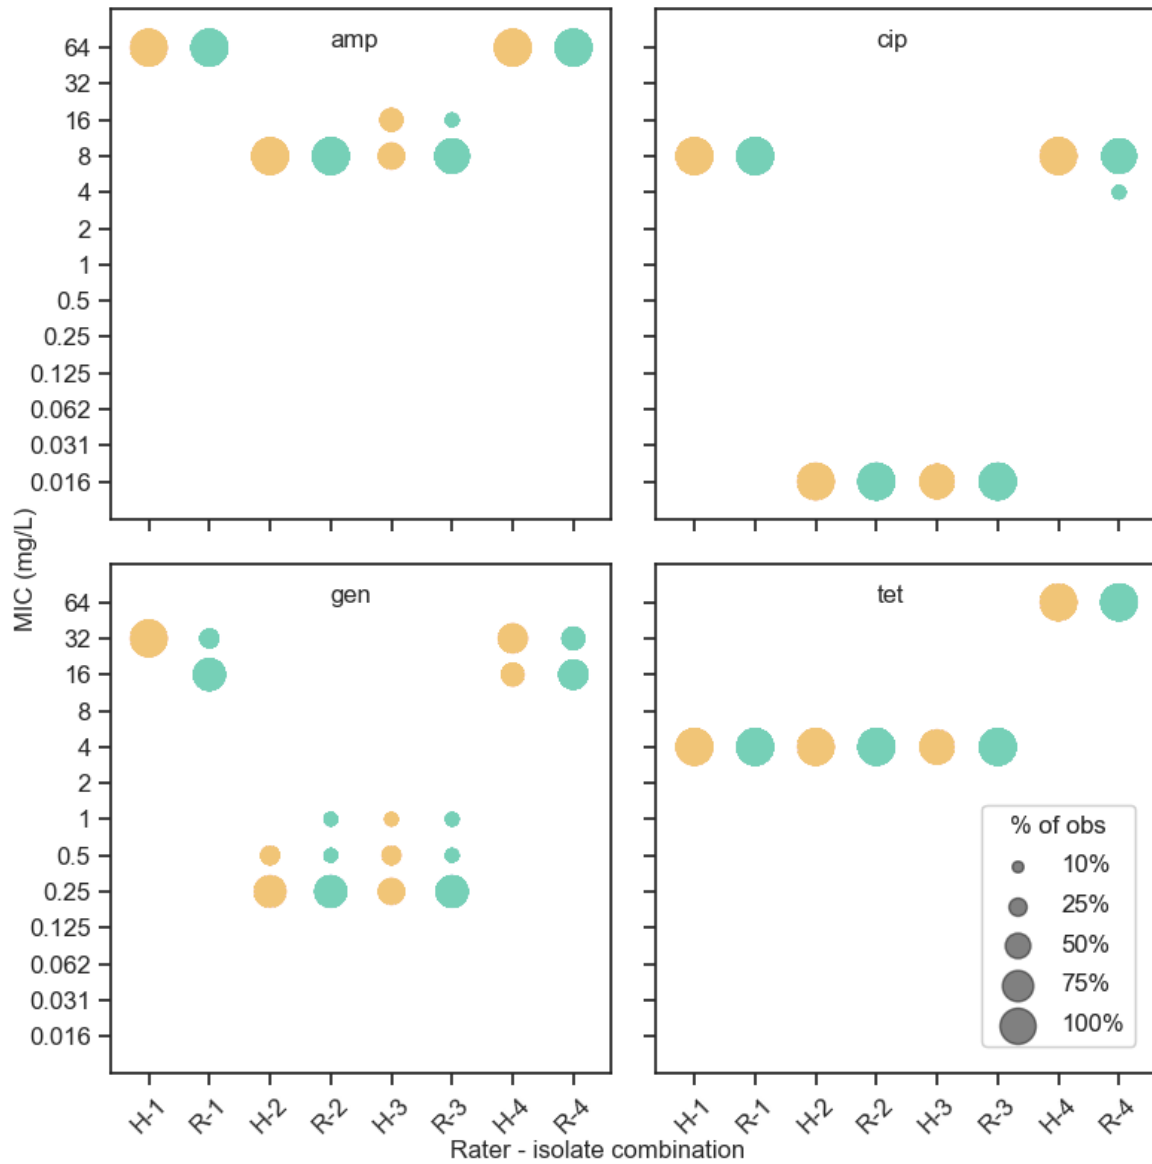

392

393 **Figure 2** | Experiment A: comparison of human ('H') and robot ('R') minimum inhibitory concentration (MIC) results of four  
394 fully susceptible *E. coli* isolates each replicated eight times per rater, tested against a panel of antimicrobials. Each isolate-  
395 rater designation displays the MIC results for all eight replicates of that combination. Antimicrobials: amp, ampicillin; cip,  
396 ciprofloxacin; gen, gentamicin; tet, tetracycline.

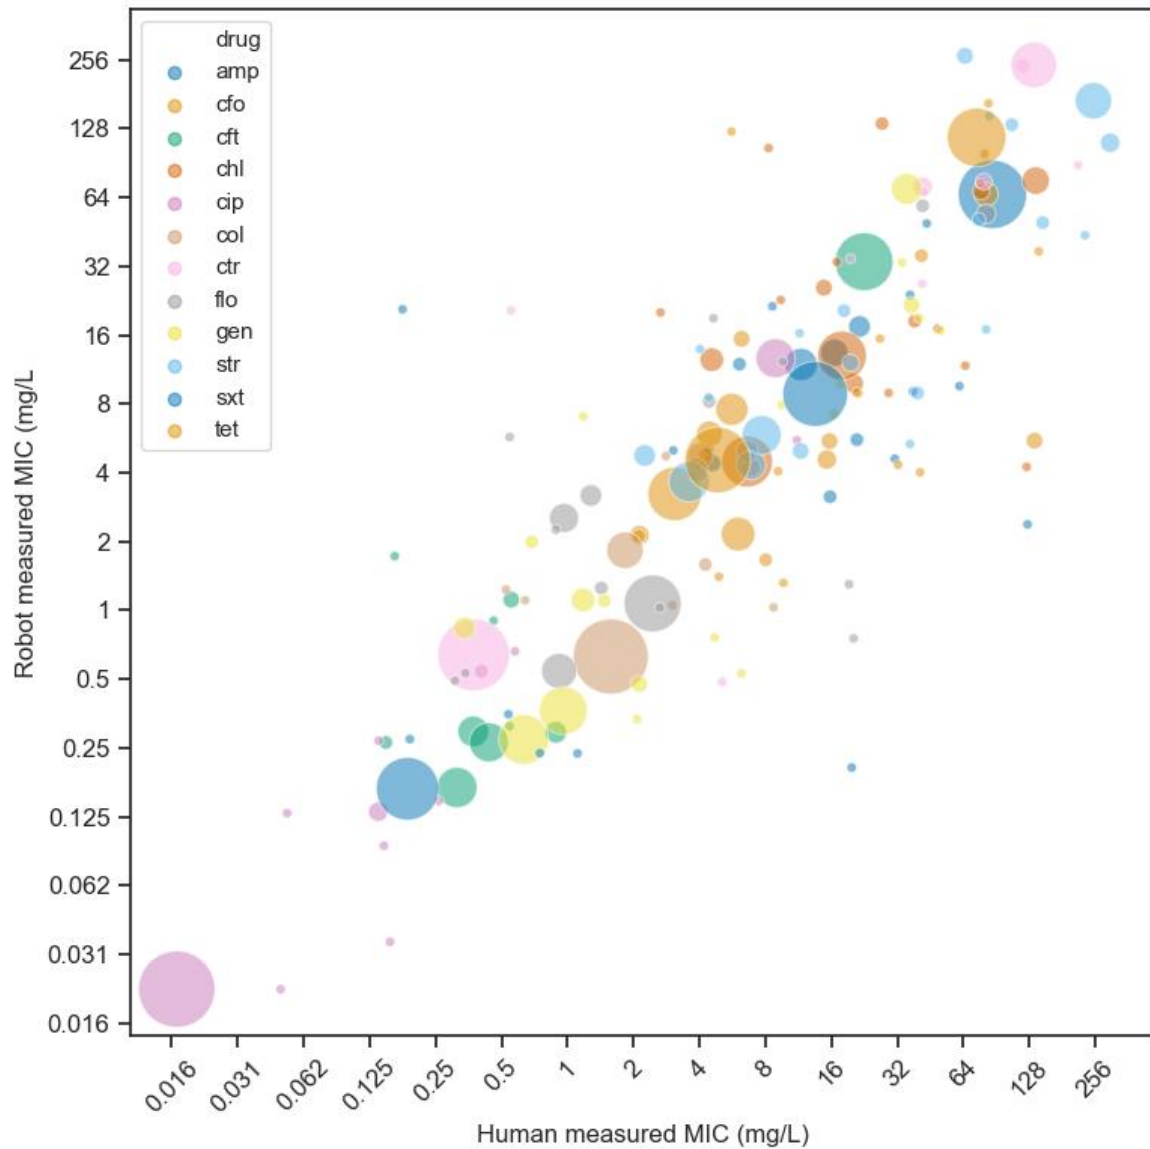

397

398 **Figure 3** | Experiment B: Paired minimum inhibitory concentration (MIC) results on 96 isolates with 12 drugs directly  
399 comparing human and robot measurements, marker size represents proportion of paired observations for the isolate-drug  
400 combination. Antimicrobials: amp, ampicillin; cfo, ceftiofur; cft, ceftiofur; chl, chloramphenicol; cip, ciprofloxacin; col,  
401 colistin; ctr, ceftriaxone; flo, florfenicol; gen, gentamicin; str, streptomycin; sxt, trimethoprim/sulfamethoxazole; tet,  
402 tetracycline.



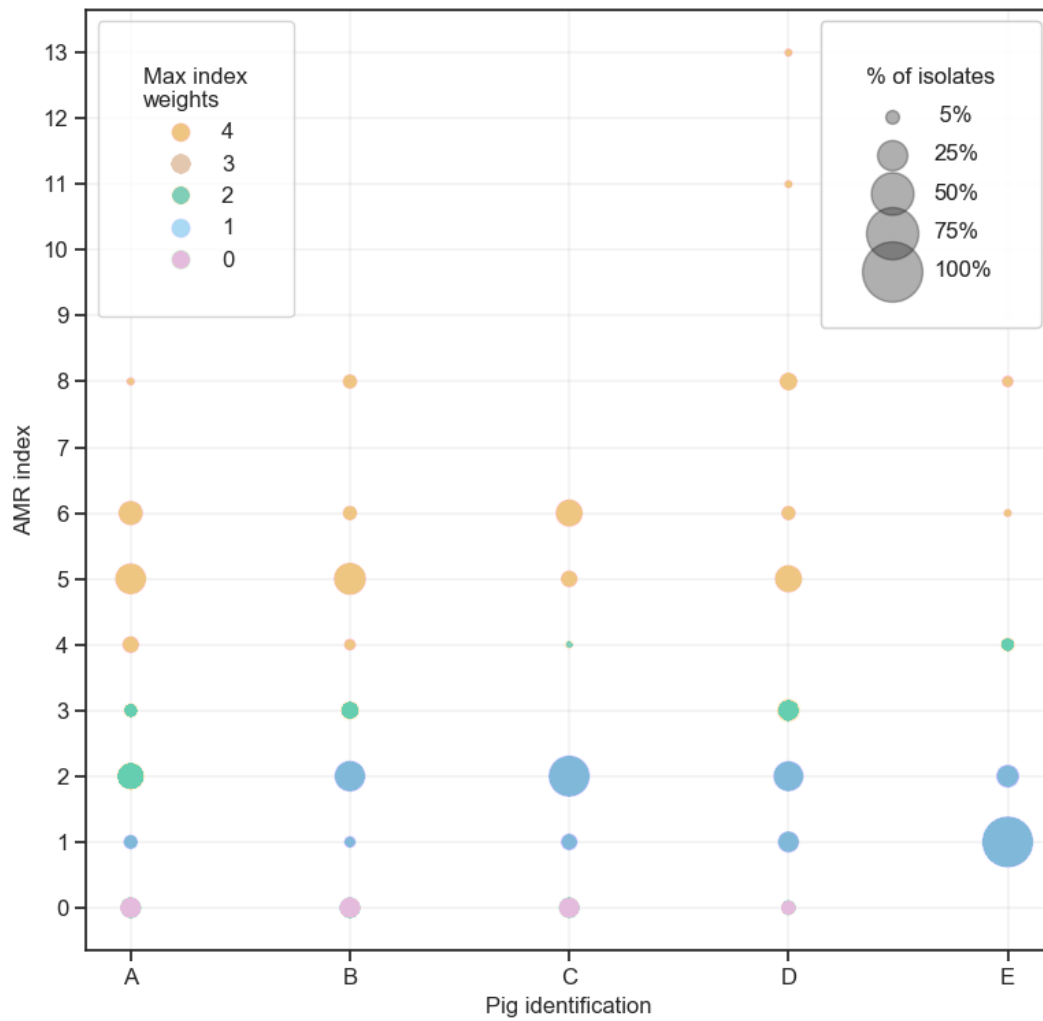

403

404 **Figure 4** | Antimicrobial resistance indexing scheme applied to 239 porcine *E. coli* isolates (48 from pigs A, B C and E, 47 from  
405 pig D) using the following antimicrobial risk-weightings (w): ampicillin (w=1), ceftiofur (w=3), ciprofloxacin (w=4), gentamicin  
406 (w= 2), tetracycline (w=1) and trimethoprim sulfamethoxazole (w=2). Colours are representative of the highest weighted  
407 resistance present for an isolate.

408
